# Supplementary material
Source: Springer Nature journal article supplement (https://www.springermedizin.de/resource/supplementary/12903_2014_476_MOESM2_ESM.pdf/9516798)

Age group

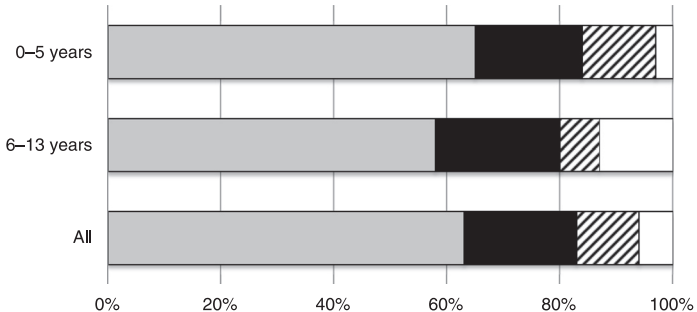

Treatment mix: □ Filling therapy ■ Tooth extraction ▨ Endodontics □ Fissure sealants

Supplement: MOESM2 [file 9516798]
